# Supplementary material for: Efficient Multi-Material Structured Thin Film Transfer to Elastomers for Stretchable Electronic Devices
Source: MDPI journal article supplement (doi:10.3390/mi13020334), 2022-02-20
Supplement: s1 [file s1]

# Supplemental Information: Efficient Multi-Material Structured Thin Film Transfer to Elastomers for Stretchable Devices

Xiuping Ding <sup>1</sup>, Jose M. Moran-Mirabal <sup>1,2,\*</sup>

<sup>1</sup> Department of Chemistry & Chemical Biology, McMaster University, 1280 Main Street West, Hamilton, ON L8S 4M8, Canada

<sup>2</sup> Brockhouse Institute for Materials Research, McMaster University, 1280 Main Street West, Hamilton, ON L8S 4M8, Canada

\* Correspondence: mirabj@mcmaster.ca

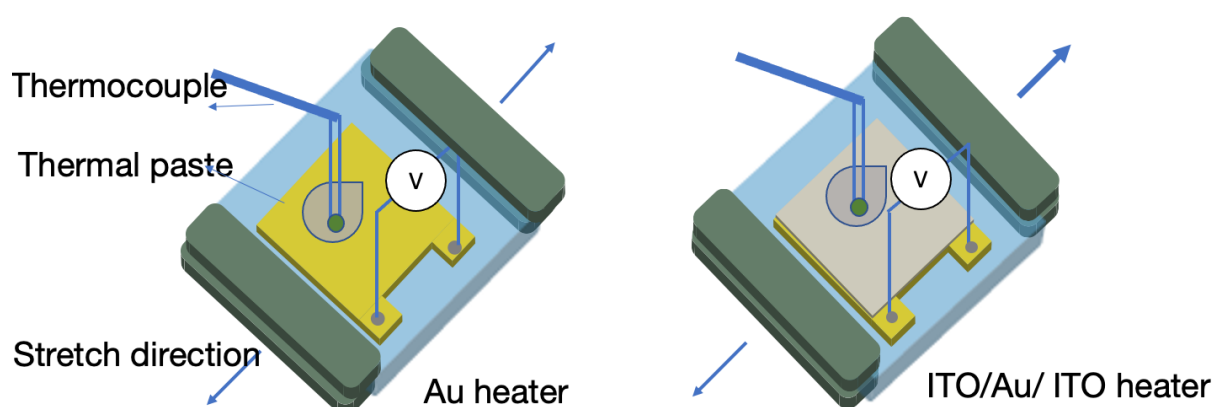

**Figure S1.** Schematic of the characterization of stretchable Au heaters and ITO/Au/ITO heaters

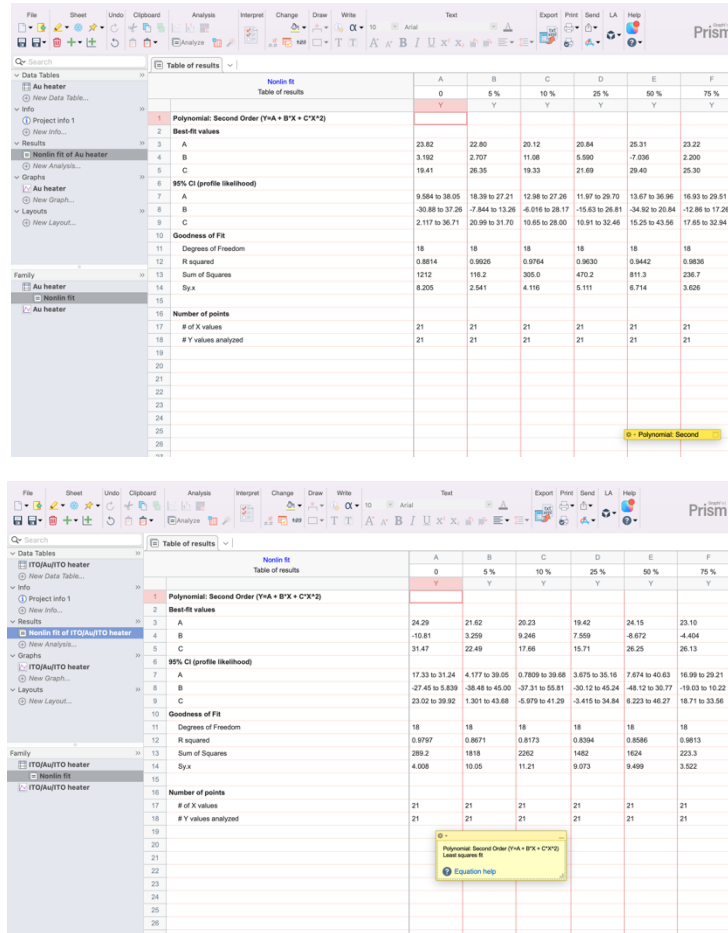

**Figure S2.** Non-linear regression performed showing the quadratic fits presented in Figures 4C and 5C for stretchable Au heaters and ITO/Au/ITO heaters
